# Supplementary material for: Associations Between Life-Course Lipid Trajectories and Subclinical Atherosclerosis in Midlife
Source: PubMed Central journal article supplement (PMC9535509; doi:10.1001/jamanetworkopen.2022.34862), 2022-10-05
Supplement: jamanetwopen-e2234862-s001.pdf [file jamanetwopen-e2234862-s001.pdf]

## Supplemental Online Content

Yan Y, Li S, Liu Y, et al. Associations between life-course lipid trajectories and subclinical atherosclerosis in midlife. *JAMA Netw Open*. 2022;5(10):e2234862.  
doi:10.1001/jamanetworkopen.2022.34862

**eTable 1.** Characteristics by TC Trajectory Group

**eTable 2.** Characteristics by Non-HDL-C Trajectory Group

**eTable 3.** Characteristics by LDL-C Trajectory Group

**eTable 4.** Characteristics by TG Trajectory Group

**eTable 5.** Characteristics by HDL-C Trajectory Group

**eTable 6.** Covariate-Adjusted Carotid IMT and *P* Values for Comparisons Between Lipid Trajectory Groups

**eTable 7.** Covariate-Adjusted Means of Adult Carotid IMT by Lipid Trajectory Group Adjusted for Clinical Risk Factors and Lipid Levels at Follow-up

**eTable 8.** Covariate-Adjusted Means of Adult Carotid IMT by Lipid Trajectory Group After Excluding Participants With Lipid-Lowering Medications

**eFigure 1.** Flow Chart of the Study Cohort Selection

**eFigure 2.** Growth Curves of Lipids by Race and Sex

This supplemental material has been provided by the authors to give readers additional information about their work.

**eTable 1. Characteristics by TC Trajectory Group**

| Characteristics                     | Low-Stable<br>(n=265) | Low-Slow<br>Increase<br>(n=556) | Low-Rapid<br>Increase<br>(n=173) | Moderate-<br>Stable<br>(n=172) | High-Stable<br>(n=35)     | P          |
|-------------------------------------|-----------------------|---------------------------------|----------------------------------|--------------------------------|---------------------------|------------|
| White, n (%)                        | 173 (65.3)            | 384 (69.1)                      | 132 (76.3)                       | 100 (58.1)                     | 20 (57.1)                 | 0.003      |
| Male, n (%)                         | 119 (44.9)            | 226 (40.6)                      | 89 (51.4)                        | 62 (36.0)                      | 14 (40.0)                 | 0.04       |
| Childhood                           |                       |                                 |                                  |                                |                           |            |
| Age, mean (SD), y                   | 12.4 (4.8)            | 12.2 (4.4)                      | 12.7 (4.2)                       | 11.0 (4.4)                     | 11.0 (3.4)                | 0.003      |
| BMI, mean (SD), kg/m <sup>2</sup>   | 19.1 (4.3)            | 19.0 (4.2)                      | 19.6 (4.6)                       | 18.9 (4.2)                     | 18.9 (3.2)                | 0.51       |
| SBP, mean (SD), mm Hg               | 103 (11)              | 102.4 (11)                      | 104 (10)                         | 101 (11)                       | 105 (13)                  | 0.12       |
| DBP, mean (SD), mm Hg               | 64 (10)               | 63.1 (10)                       | 64 (9)                           | 62 (10)                        | 64 (10)                   | 0.27       |
| Glucose, mean (SD), mg/dL           | 86.3 (8.2)            | 86.7 (8.5)                      | 87.9 (8.5)                       | 87.4 (14.9)                    | 89.1 (7.0)                | 0.25       |
| TC, mean (SD), mg/dL                | 130.9<br>(17.6)       | 152.0 (17.5)                    | 168.0 (20.3)                     | 182.1 (23.2)                   | 212.4<br>(31.1)           | <0.00<br>1 |
| non-HDL-C, mean (SD),<br>mg/dL      | 73.4 (17.9)           | 90.9 (20.1)                     | 106.6 (24.9)                     | 114.5 (27.8)                   | 137.5<br>(34.9)           | <0.00<br>1 |
| LDL-C, mean (SD), mg/dL             | 67.5 (15.9)           | 83.6 (17.4)                     | 97.8 (20.8)                      | 106.1 (23.8)                   | 127.9<br>(31.6)           | <0.00<br>1 |
| TG, median (IQR), mg/dL             | 53.0<br>(42.0-68.0)   | 59.0<br>(47.0-77.0)             | 65.0<br>(50.0-88.0)              | 66.5<br>(50.0-84.0)            | 64.0<br>(52.0-91.0)       | <0.00<br>1 |
| HDL-C, mean (SD), mg/dL             | 57.4 (16.5)           | 61.1 (16)                       | 61.4 (20)                        | 67.6 (20.8)                    | 74.9 (24.2)               | <0.00<br>1 |
| Adulthood                           |                       |                                 |                                  |                                |                           |            |
| Age, mean (SD), y                   | 45.5 (7.2)            | 46.1 (6.7)                      | 46.1 (6.2)                       | 44.5 (6.7)                     | 45.5 (6.6)                | 0.08       |
| BMI, mean (SD), kg/m <sup>2</sup>   | 30.5 (8)              | 30.7 (7.3)                      | 31.3 (7.1)                       | 31.8 (8)                       | 33.3 (8.0)                | 0.11       |
| SBP, mean (SD), mm Hg               | 122 (17)              | 122 (17)                        | 121 (13)                         | 122 (17)                       | 123 (17)                  | 0.91       |
| DBP, mean (SD), mm Hg               | 78 (11)               | 79 (11)                         | 79 (9)                           | 79 (12)                        | 81 (10)                   | 0.75       |
| Glucose, mean (SD), mg/dL           | 103 (36.6)            | 101.4 (32.3)                    | 110.4 (56.1)                     | 105.5 (38.1)                   | 110.3<br>(51.6)           | 0.08       |
| TC, mean (SD), mg/dL                | 159.4<br>(26.7)       | 195.1 (31.4)                    | 233.7 (39.2)                     | 194.9 (32.6)                   | 257.4<br>(54.2)           | <0.00<br>1 |
| non-HDL-C, mean (SD),<br>mg/dL      | 110.6<br>(27.8)       | 142.6 (34.6)                    | 181.5 (40.7)                     | 142.9 (34.9)                   | 199.0<br>(56.5)           | <0.00<br>1 |
| LDL-C, mean (SD), mg/dL             | 88.9 (24.2)           | 119.2 (29.1)                    | 152.6 (32.8)                     | 123.4 (30.1)                   | 176.2<br>(65.8)           | <0.00<br>1 |
| TG, median (IQR), mg/dL             | 90.0<br>(67-131)      | 109.0<br>(76.0-153.0)           | 151.0<br>(95.0-226.0)            | 102.5<br>(76.0-143.0)          | 153.0<br>(99.0-<br>252.0) | <0.00<br>1 |
| HDL-C, mean (SD), mg/dL             | 48.5 (14.7)           | 51.3 (15.7)                     | 51 (16.3)                        | 51.9 (15.6)                    | 57.3 (14.3)               | 0.009      |
| Lipid-lowering Medication, n<br>(%) | 13 (4.9)              | 49 (8.8)                        | 37 (21.4)                        | 40 (23.3)                      | 11 (31.4)                 | <0.00<br>1 |
| Hypertension, n (%)                 | 101 (38.1)            | 206 (37.1)                      | 70 (40.5)                        | 78 (45.3)                      | 19 (54.3)                 | 0.12       |
| Diabetes, n (%)                     | 40 (15.1)             | 77 (13.8)                       | 33 (19.1)                        | 31 (18.0)                      | 5 (14.3)                  | 0.43       |
| Smoking, n (%)                      | 74 (27.9)             | 163 (29.3)                      | 59 (34.1)                        | 47 (27.3)                      | 8 (22.9)                  | 0.53       |
| Alcohol drinking, n (%)             | 90 (34.0)             | 194 (34.9)                      | 60 (34.7)                        | 49 (28.5)                      | 6 (17.1)                  | 0.15       |
| Carotid IMT, mean (SD),<br>mm       | 0.871<br>(0.258)      | 0.918<br>(0.294)                | 0.958<br>(0.290)                 | 0.897 (0.289)                  | 1.033<br>(0.380)          | 0.002      |

Abbreviations: BMI, body mass index; SBP, systolic blood pressure; DBP, diastolic blood pressure; TC, total cholesterol; non-HDL-C, Non-high-density lipoprotein-cholesterol; LDL-C, low-density lipoprotein cholesterol; HDL-C, high-density lipoprotein cholesterol; TG, triglycerides; IMT, intima-media thickness.

SI conversion factor: To convert glucose to mmol/L, multiply by 0.0555; to convert TC, non-HDL-C, LDL-C, and HDL-

C to mmol/L, multiply by 0.0259; to convert TG to mmol/L, multiply by 0.0113.

One-way ANOVA and chi-square tests were performed for continuous variables and categorical variables, respectively.

**eTable 2. Characteristics by Non-HDL-C Trajectory Group**

| Characteristics                   | Low-Stable<br>(n=316) | Low-Slow<br>Increase<br>(n=561) | Low-Rapid<br>Increase<br>(n=143) | Moderate-<br>Stable<br>(n=165) | High-Stable<br>(n=16) | P      |
|-----------------------------------|-----------------------|---------------------------------|----------------------------------|--------------------------------|-----------------------|--------|
| White, n (%)                      | 190 (60.1)            | 378 (67.4)                      | 109 (76.2)                       | 119 (72.1)                     | 13 (81.3)             | 0.003  |
| Male, n (%)                       | 127 (40.2)            | 227 (40.5)                      | 91 (63.6)                        | 60 (36.4)                      | 5 (31.3)              | <0.001 |
| <b>Childhood</b>                  |                       |                                 |                                  |                                |                       |        |
| Age, mean (SD), y                 | 12.6 (4.7)            | 12.0 (4.4)                      | 12.8 (3.8)                       | 10.9 (4.4)                     | 12.3 (6.6)            | <0.001 |
| BMI, mean (SD), kg/m <sup>2</sup> | 18.8 (4.2)            | 19 (4.2)                        | 19.3 (4.1)                       | 19.6 (4.8)                     | 21.9 (5.4)            | 0.02   |
| SBP, mean (SD), mm Hg             | 103 (11)              | 103 (11)                        | 104 (11)                         | 102 (11)                       | 107 (9)               | 0.15   |
| DBP, mean (SD), mm Hg             | 64 (10)               | 63 (10)                         | 65 (9)                           | 62 (10)                        | 64 (11)               | 0.04   |
| Glucose, mean (SD), mg/dL         | 86.2 (8.5)            | 87.0 (8.8)                      | 88.1 (8.3)                       | 87.1 (14.3)                    | 91.6 (6.6)            | 0.11   |
| TC, mean (SD), mg/dL              | 136.8 (20.1)          | 154.2 (20.6)                    | 163.7 (22.0)                     | 183.8 (24.5)                   | 222.8 (35.8)          | <0.001 |
| non-HDL-C, mean (SD), mg/dL       | 72.5 (16.4)           | 91.9 (17.7)                     | 102.6 (19.0)                     | 128.3 (25.3)                   | 168 (31.1)            | <0.001 |
| LDL-C, mean (SD), mg/dL           | 67.3 (14.9)           | 84.9 (16.0)                     | 94.4 (17.1)                      | 116.6 (21.8)                   | 150.3 (30.0)          | <0.001 |
| TG, median (IQR), mg/dL           | 52.0 (41.0-65.0)      | 59.0 (46.0-76.0)                | 65.0 (51.0-86.0)                 | 78.0 (57.0-106.0)              | 91.5 (65.0-126.0)     | <0.001 |
| HDL-C, mean (SD), mg/dL           | 64.3 (16.7)           | 62.3 (17.2)                     | 61.1 (18.4)                      | 55.5 (21.1)                    | 54.7 (24.9)           | <0.001 |
| <b>Adulthood</b>                  |                       |                                 |                                  |                                |                       |        |
| Age, mean (SD), y                 | 46.2 (6.9)            | 45.9 (6.8)                      | 46.1 (6.5)                       | 43.9 (6.8)                     | 45.5 (4.7)            | 0.008  |
| BMI, mean (SD), kg/m <sup>2</sup> | 29.4 (7.0)            | 31.2 (7.7)                      | 31.7 (7.3)                       | 32.0 (8.0)                     | 36.2 (7.0)            | <0.001 |
| SBP, mean (SD), mm Hg             | 122 (17)              | 122 (17)                        | 123 (14)                         | 121 (16)                       | 129 (17)              | 0.31   |
| DBP, mean (SD), mm Hg             | 78 (11)               | 79 (11)                         | 80 (9)                           | 79 (12)                        | 84 (10)               | 0.09   |
| Glucose, mean (SD), mg/dL         | 98.7 (28.5)           | 103.1 (35.8)                    | 112.4 (57.0)                     | 105.6 (41.2)                   | 138.6 (69.5)          | <0.001 |
| TC, mean (SD), mg/dL              | 166.1 (28.4)          | 195.2 (32.9)                    | 229.2 (43.9)                     | 210 (36.6)                     | 281.7 (66.6)          | <0.001 |
| non-HDL-C, mean (SD), mg/dL       | 109.2 (26.6)          | 143.4 (31.9)                    | 183.4 (44.3)                     | 162.2 (34.4)                   | 237.4 (62.4)          | <0.001 |
| LDL-C, mean (SD), mg/dL           | 89.3 (22.6)           | 121.4 (29.1)                    | 151.9 (35.6)                     | 135.9 (30.5)                   | 212.3 (83.4)          | <0.001 |
| TG, median (IQR), mg/dL           | 84.5 (63.0-113.5)     | 111.0 (77.0-155.0)              | 170.0 (107.0-241.0)              | 125.5 (89.5-185.5)             | 187.0 (114.5-293.5)   | <0.001 |
| HDL-C, mean (SD), mg/dL           | 55.8 (17.5)           | 50.7 (14.9)                     | 45.6 (12.2)                      | 47.5 (14.2)                    | 43.7 (12.1)           | <0.001 |
| Lipid-lowering Medication, n (%)  | 15 (4.7)              | 57 (10.2)                       | 39 (27.3)                        | 33 (20.0)                      | 6 (37.5)              | <0.001 |
| Hypertension, n (%)               | 114 (36.1)            | 217 (38.7)                      | 61 (42.7)                        | 69 (41.8)                      | 13 (81.3)             | 0.006  |
| Diabetes, n (%)                   | 37 (11.7)             | 83 (14.8)                       | 27 (18.9)                        | 34 (20.6)                      | 5 (31.3)              | 0.02   |
| Smoking, n (%)                    | 82 (25.9)             | 171 (30.5)                      | 47 (32.9)                        | 43 (26.1)                      | 8 (50.0)              | 0.12   |
| Alcohol drinking, n (%)           | 114 (36.1)            | 187 (33.3)                      | 48 (33.6)                        | 47 (28.5)                      | 3 (18.8)              | 0.37   |
| Carotid IMT, mean (SD), mm        | 0.856 (0.211)         | 0.910 (0.287)                   | 0.987 (0.328)                    | 0.947 (0.338)                  | 1.158 (0.475)         | <0.001 |

Abbreviations: BMI, body mass index; SBP, systolic blood pressure; DBP, diastolic blood pressure; TC, total cholesterol; non-HDL-C, Non-high-density lipoprotein-cholesterol; LDL-C, low-density lipoprotein cholesterol; HDL-C, high-density lipoprotein cholesterol; TG, triglycerides; IMT, intima-media thickness.

SI conversion factor: To convert glucose to mmol/L, multiply by 0.0555; to convert TC, non-HDL-C, LDL-C, and HDL-C  
© 2022 Yan Y et al. *JAMA Network Open*.

C to mmol/L, multiply by 0.0259; to convert TG to mmol/L, multiply by 0.0113.

One-way ANOVA and chi-square tests were performed for continuous variables and categorical variables, respectively.

**eTable 3. Characteristics by LDL-C Trajectory Group**

| Characteristics                     | Low-Stable<br>(n=299)    | Low-Slow<br>Increase<br>(n=550) | Low-Rapid<br>Increase<br>(n=199) | Moderate-<br>Stable<br>(n=134) | High-Stable<br>(n=19)     | P          |
|-------------------------------------|--------------------------|---------------------------------|----------------------------------|--------------------------------|---------------------------|------------|
| White, n (%)                        | 182 (60.9)               | 376 (68.4)                      | 145 (72.9)                       | 92 (68.7)                      | 14 (73.7)                 | 0.06       |
| Male, n (%)                         | 123 (41.1)               | 224 (40.7)                      | 104 (52.3)                       | 51 (38.1)                      | 8 (42.1)                  | 0.04       |
| Childhood                           |                          |                                 |                                  |                                |                           |            |
| Age, mean (SD), y                   | 12.4 (4.6)               | 12.2 (4.6)                      | 12.5 (4.0)                       | 10.9 (4.3)                     | 11.3 (3.7)                | 0.009      |
| BMI, mean (SD), kg/m <sup>2</sup>   | 18.8 (4.0)               | 19 (4.3)                        | 19.6 (4.4)                       | 19.2 (4.4)                     | 19.7 (3.8)                | 0.28       |
| SBP, mean (SD), mm Hg               | 103 (12)                 | 103 (11)                        | 104 (11)                         | 102 (11)                       | 103 (10)                  | 0.35       |
| DBP, mean (SD), mm Hg               | 64 (10)                  | 63 (10)                         | 64 (10)                          | 62 (10)                        | 63 (10)                   | 0.31       |
| Glucose, mean (SD), mg/dL           | 86.3 (8.5)               | 87.2 (10.6)                     | 87.5 (8.8)                       | 86.4 (8.8)                     | 90.6 (6.2)                | 0.23       |
| TC, mean (SD), mg/dL                | 136.1<br>(20.2)          | 152.7 (20.0)                    | 167.9 (21.7)                     | 185.4 (24.7)                   | 215.1<br>(37.3)           | <0.00<br>1 |
| non-HDL-C, mean (SD),<br>mg/dL      | 73.2 (18.4)              | 90.8 (18.0)                     | 105.4 (21.0)                     | 128.9 (26.1)                   | 153.1<br>(36.8)           | <0.00<br>1 |
| LDL-C, mean (SD), mg/dL             | 67.2 (16.0)              | 83.8 (15.6)                     | 97.2 (18.0)                      | 118 (22.3)                     | 141.4<br>(33.4)           | <0.00<br>1 |
| TG, median (IQR), mg/dL             | 53.0<br>(42.0-69.0)      | 57.0<br>(46.0-76.0)             | 65.0<br>(49.0-83.0)              | 75.5<br>(58.0-99.0)            | 65.0<br>(58.0-92.0)       | <0.00<br>1 |
| HDL-C, mean (SD), mg/dL             | 62.9 (17.5)              | 61.9 (16.8)                     | 62.4 (19.1)                      | 56.5 (21.1)                    | 62.0 (26.2)               | 0.012      |
| Adulthood                           |                          |                                 |                                  |                                |                           |            |
| Age, mean (SD), y                   | 45.7 (7.0)               | 46.2 (6.8)                      | 45.9 (6.4)                       | 43.6 (6.8)                     | 44.5 (5.8)                | 0.002      |
| BMI, mean (SD), kg/m <sup>2</sup>   | 29.7 (7.3)               | 31.1 (7.7)                      | 31.8 (7.4)                       | 31.6 (7.7)                     | 34.6 (7.9)                | 0.002      |
| SBP, mean (SD), mm Hg               | 122 (17)                 | 123 (17)                        | 122 (15)                         | 119 (16)                       | 125 (13)                  | 0.31       |
| DBP, mean (SD), mm Hg               | 79 (11)                  | 79 (11)                         | 79 (10)                          | 79 (12)                        | 82 (10)                   | 0.59       |
| Glucose, mean (SD), mg/dL           | 99.8 (31.2)              | 104.8 (41.0)                    | 106.3 (41.1)                     | 102.4 (37.3)                   | 125.7<br>(66.2)           | 0.03       |
| TC, mean (SD), mg/dL                | 164.8<br>(28.0)          | 193.7 (33.1)                    | 231.9 (40.8)                     | 203.6 (35.4)                   | 263.4<br>(64.6)           | <0.00<br>1 |
| non-HDL-C, mean (SD),<br>mg/dL      | 108.8<br>(26.7)          | 141.9 (33.0)                    | 183.9 (40.4)                     | 155.6 (35.4)                   | 211.3<br>(62.0)           | <0.00<br>1 |
| LDL-C, mean (SD), mg/dL             | 86.9 (22.0)              | 118.9 (27.2)                    | 157.0 (31.0)                     | 129.5 (27.5)                   | 195.5<br>(75.7)           | <0.00<br>1 |
| TG, median (IQR), mg/dL             | 88.0<br>(65.0-<br>131.0) | 108.0<br>(76.0-152.0)           | 138.0<br>(92.0-208.0)            | 121.5<br>(84.0-181.0)          | 124.0<br>(88.0-<br>194.0) | <0.00<br>1 |
| HDL-C, mean (SD), mg/dL             | 54.5 (17)                | 50.7 (15.6)                     | 48.3 (13.1)                      | 47.7 (14.5)                    | 49.7 (13.5)               | <0.00<br>1 |
| Lipid-lowering Medication, n<br>(%) | 13 (4.3)                 | 64 (11.6)                       | 33 (16.6)                        | 33 (24.6)                      | 7 (36.8)                  | <0.00<br>1 |
| Hypertension, n (%)                 | 112 (37.5)               | 212 (38.5)                      | 83 (41.7)                        | 54 (40.3)                      | 13 (68.4)                 | 0.10       |
| Diabetes, n (%)                     | 39 (13.0)                | 89 (16.2)                       | 36 (18.1)                        | 18 (13.4)                      | 4 (21.1)                  | 0.48       |
| Smoking, n (%)                      | 80 (26.8)                | 171 (31.1)                      | 62 (31.2)                        | 31 (23.1)                      | 7 (36.8)                  | 0.28       |
| Alcohol drinking, n (%)             | 111 (37.1)               | 180 (32.7)                      | 67 (33.7)                        | 36 (26.9)                      | 5 (26.3)                  | 0.29       |
| Carotid IMT, mean (SD),<br>mm       | 0.844<br>(0.204)         | 0.929<br>(0.301)                | 0.969<br>(0.323)                 | 0.906 (0.319)                  | 1.044<br>(0.320)          | <0.00<br>1 |

Abbreviations: BMI, body mass index; SBP, systolic blood pressure; DBP, diastolic blood pressure; TC, total cholesterol; non-HDL-C, Non-high-density lipoprotein-cholesterol; LDL-C, low-density lipoprotein cholesterol; HDL-C, high-density lipoprotein cholesterol; TG, triglycerides; IMT, intima-media thickness.

SI conversion factor: To convert glucose to mmol/L, multiply by 0.0555; to convert TC, non-HDL-C, LDL-C, and HDL-C to mmol/L, multiply by 0.0259; to convert TG to mmol/L, multiply by 0.0113.

One-way ANOVA and chi-square tests were performed for continuous variables and categorical variables, respectively.

**eTable 4. Characteristics by TG Trajectory Group**

| Characteristics                   | Low-Stable<br>(n=237) | Low-Slow<br>Increase<br>(n=505) | Low-Rapid<br>Increase<br>(n=191) | Moderate-<br>Stable<br>(n=202) | Moderate-<br>Rapid<br>Increase<br>(n=66) | P      |
|-----------------------------------|-----------------------|---------------------------------|----------------------------------|--------------------------------|------------------------------------------|--------|
| White, n (%)                      | 112 (47.3)            | 333 (65.9)                      | 144 (75.4)                       | 165 (81.7)                     | 55 (83.3)                                | <0.001 |
| Male, n (%)                       | 79 (33.3)             | 194 (38.4)                      | 128 (67.0)                       | 68 (33.7)                      | 41 (62.1)                                | <0.001 |
| Childhood                         |                       |                                 |                                  |                                |                                          |        |
| Age, mean (SD), y                 | 12.2 (4.5)            | 12.2 (4.4)                      | 11.9 (4)                         | 11.9 (4.7)                     | 12.7 (5.2)                               | 0.76   |
| BMI, mean (SD), kg/m <sup>2</sup> | 18.3 (3.8)            | 18.9 (4.1)                      | 18.7 (3.4)                       | 20.3 (5.2)                     | 20.6 (5.0)                               | <0.001 |
| SBP, mean (SD), mm Hg             | 102 (12)              | 103 (11)                        | 103 (11)                         | 103 (11)                       | 105 (10)                                 | 0.16   |
| DBP, mean (SD), mm Hg             | 63 (10)               | 63 (10)                         | 63 (10)                          | 64 (10)                        | 66 (9)                                   | 0.47   |
| Glucose, mean (SD), mg/dL         | 85.8 (9.2)            | 86.7 (8.4)                      | 87.5 (9.2)                       | 87.1 (8.4)                     | 91.7 (18.7)                              | <0.001 |
| TC, mean (SD), mg/dL              | 149.1 (24.7)          | 153.5 (25)                      | 153.8 (25.8)                     | 168.6 (29.5)                   | 162.3 (32.0)                             | <0.001 |
| non-HDL-C, mean (SD), g/dL        | 82.7 (23.5)           | 89.8 (22.7)                     | 90.9 (21.2)                      | 115.0 (28.2)                   | 112.5 (36.1)                             | <0.001 |
| LDL-C, mean (SD), mg/dL           | 77.7 (22.0)           | 83.6 (20.9)                     | 84.4 (19.8)                      | 102.6 (25.8)                   | 99.0 (30.2)                              | <0.001 |
| TG, median (IQR), mg/dL           | 47.0 (38.0-58.0)      | 57.0 (46.0-71.0)                | 57.0 (47.0-74.0)                 | 89.5 (68.0-114.0)              | 95.0 (77.0-111.0)                        | <0.001 |
| HDL-C, mean (SD), mg/dL           | 66.5 (16.3)           | 63.7 (16.0)                     | 62.9 (19.2)                      | 53.6 (19.6)                    | 49.8 (19.3)                              | <0.001 |
| Adulthood                         |                       |                                 |                                  |                                |                                          |        |
| Age, mean (SD), y                 | 46.1 (6.4)            | 45.8 (7.0)                      | 45.1 (7.0)                       | 45.5 (6.5)                     | 46.0 (7.0)                               | 0.62   |
| BMI, mean (SD), kg/m <sup>2</sup> | 29.3 (7.0)            | 30.6 (7.7)                      | 31.9 (6.5)                       | 32.2 (8.5)                     | 33.6 (7.4)                               | <0.001 |
| SBP, mean (SD), mm Hg             | 120 (17)              | 122 (17)                        | 125 (15)                         | 120 (16)                       | 127 (16)                                 | <0.001 |
| DBP, mean (SD), mm Hg             | 77 (11)               | 79 (11)                         | 81 (10)                          | 79 (11)                        | 83 (11)                                  | <0.001 |
| Glucose, mean (SD), mg/dL         | 96.6 (26.8)           | 100.4 (32.0)                    | 113.3 (52.8)                     | 102.5 (33.2)                   | 134.3 (67.6)                             | <0.001 |
| TC, mean (SD), mg/dL              | 181.2 (34)            | 192.1 (38.0)                    | 200.5 (44.5)                     | 201.9 (39.9)                   | 226.4 (52.6)                             | <0.001 |
| non-HDL-C, mean (SD), g/dL        | 121.5 (32.3)          | 139.8 (37.8)                    | 156.4 (44.2)                     | 150.8 (40.1)                   | 185.7 (51.1)                             | <0.001 |
| LDL-C, mean (SD), mg/dL           | 105.8 (30.3)          | 119 (34.1)                      | 125.5 (40.4)                     | 128.8 (42.6)                   | 129.3 (42.0)                             | <0.001 |
| TG, median (IQR), mg/dL           | 66.0 (53.0-81.0)      | 98.0 (77.0-126.0)               | 187.0 (136.0-235.0)              | 141.5 (105.0-176.5)            | 275.5 (207.0-350.0)                      | <0.001 |
| HDL-C, mean (SD), mg/dL           | 58.9 (16.3)           | 51.4 (14.6)                     | 44.8 (13.2)                      | 49.8 (15.6)                    | 39.1 (10.5)                              | <0.001 |
| Lipid-lowering Medication, n (%)  | 20 (8.4)              | 50 (9.9)                        | 29 (15.2)                        | 33 (16.3)                      | 18 (27.3)                                | <0.001 |
| Hypertension, n (%)               | 76 (32.1)             | 201 (39.8)                      | 83 (43.5)                        | 79 (39.1)                      | 35 (53.0)                                | 0.02   |
| Diabetes, n (%)                   | 22 (9.3)              | 62 (12.3)                       | 44 (23.0)                        | 34 (16.8)                      | 24 (36.4)                                | <0.001 |
| Smoking, n (%)                    | 47 (19.8)             | 151 (29.9)                      | 57 (29.8)                        | 73 (36.1)                      | 23 (34.8)                                | 0.003  |
| Alcohol drinking, n (%)           | 69 (29.1)             | 175 (34.7)                      | 68 (35.6)                        | 69 (34.2)                      | 18 (27.3)                                | 0.42   |
| Carotid IMT, mean (SD), mm        | 0.851 (0.204)         | 0.907 (0.271)                   | 0.956 (0.285)                    | 0.936 (0.268)                  | 0.994 (0.375)                            | <0.001 |

Abbreviations: BMI, body mass index; SBP, systolic blood pressure; DBP, diastolic blood pressure; TC, total cholesterol;



non-HDL-C, Non-high-density lipoprotein-cholesterol; LDL-C, low-density lipoprotein cholesterol; HDL-C, high-density lipoprotein cholesterol; TG, triglycerides; IMT, intima-media thickness.

SI conversion factor: To convert glucose to mmol/L, multiply by 0.0555; to convert TC, non-HDL-C, LDL-C, and HDL-C to mmol/L, multiply by 0.0259; to convert TG to mmol/L, multiply by 0.0113.

One-way ANOVA and chi-square tests were performed for continuous variables and categorical variables, respectively.

**eTable 5. Characteristics by HDL-C Trajectory Group**

| Characteristics                   | Low-Stable<br>(n=226) | Moderate-Slow<br>Decrease<br>(n=606) | Moderate-Stable<br>(n=137) | High-Rapid<br>Decrease<br>(n=182) | High-Stable<br>(n=50) | P      |
|-----------------------------------|-----------------------|--------------------------------------|----------------------------|-----------------------------------|-----------------------|--------|
| White, n (%)                      | 186 (82.3)            | 426 (70.3)                           | 78 (56.9)                  | 99 (54.4)                         | 20 (40.0)             | <0.001 |
| Male, n (%)                       | 114 (50.4)            | 266 (43.9)                           | 30 (21.9)                  | 85 (46.7)                         | 15 (30.0)             | <0.001 |
| <b>Childhood</b>                  |                       |                                      |                            |                                   |                       |        |
| Age, mean (SD), y                 | 11.6 (4.4)            | 11.9 (4.5)                           | 12.2 (4.7)                 | 13.3 (4.2)                        | 12.5 (4.6)            | 0.002  |
| BMI, mean (SD), kg/m <sup>2</sup> | 20.1 (5.1)            | 18.9 (4.3)                           | 18.6 (3.5)                 | 19.0 (3.6)                        | 18.2 (3.1)            | 0.001  |
| SBP, mean (SD), mm Hg             | 104 (11)              | 102 (11)                             | 101 (10)                   | 104 (11)                          | 106 (14)              | 0.04   |
| DBP, mean (SD), mm Hg             | 64 (10)               | 62 (10)                              | 64 (10)                    | 65 (10)                           | 68 (12)               | <0.001 |
| Glucose, mean (SD), mg/dL         | 86.2 (8.9)            | 87.5 (10.3)                          | 85.3 (8.6)                 | 87.9 (9.1)                        | 85.4 (8.0)            | 0.03   |
| TC, mean (SD), mg/dL              | 150.5 (28)            | 153.3 (26.3)                         | 158.8 (26.5)               | 163.2 (25.5)                      | 172.8 (26.5)          | <0.001 |
| non-HDL-C, mean (SD), g/dL        | 107.7 (30.9)          | 92.6 (25.2)                          | 92.4 (25.1)                | 85.2 (22.7)                       | 87.5 (26.0)           | <0.001 |
| LDL-C, mean (SD), mg/dL           | 96.1 (27.2)           | 85.2 (22.3)                          | 86.6 (24.0)                | 80.6 (21.5)                       | 82.4 (24.4)           | <0.001 |
| TG, median (IQR), mg/dL           | 77.0 (57.0-106.0)     | 59.0 (46.0-76.0)                     | 58.0 (46.0-74.0)           | 51.0 (42.0-63.0)                  | 55.0 (44.0-68.0)      | <0.001 |
| HDL-C, mean (SD), mg/dL           | 42.7 (13.8)           | 60.8 (13.5)                          | 66.4 (13.7)                | 78 (15.6)                         | 85.3 (14.4)           | <0.001 |
| <b>Adulthood</b>                  |                       |                                      |                            |                                   |                       |        |
| Age, mean (SD), y                 | 45.0 (7.0)            | 45.3 (6.8)                           | 46.7 (5.9)                 | 46.8 (7.0)                        | 46.8 (6.3)            | 0.009  |
| BMI, mean (SD), kg/m <sup>2</sup> | 32.8 (7.7)            | 31 (7.8)                             | 28.2 (6.8)                 | 31.3 (6.9)                        | 29.2 (5.8)            | <0.001 |
| SBP, mean (SD), mm Hg             | 123 (15)              | 122 (17)                             | 120 (16)                   | 122 (15)                          | 120 (16)              | 0.39   |
| DBP, mean (SD), mm Hg             | 80 (11)               | 79 (11)                              | 78 (12)                    | 78 (10)                           | 80 (10)               | 0.31   |
| Glucose, mean (SD), mg/dL         | 108.8 (41.7)          | 104.7 (38)                           | 93.7 (39.9)                | 105.0 (40.8)                      | 95.9 (20.2)           | 0.004  |
| TC, mean (SD), mg/dL              | 187.6 (42.9)          | 194.0 (40.0)                         | 205.8 (41.5)               | 194.5 (40.4)                      | 202.6 (31.3)          | 0.006  |
| non-HDL-C, mean (SD), g/dL        | 147.4 (42.8)          | 146.2 (40.8)                         | 132.7 (43.5)               | 139.0 (42.0)                      | 125.6 (33.7)          | 0.001  |
| LDL-C, mean (SD), mg/dL           | 118.5 (36.6)          | 121.6 (37.5)                         | 113.0 (36.0)               | 120.5 (38.6)                      | 112.2 (33.0)          | 0.09   |
| TG, median (IQR), mg/dL           | 141.0 (103.0-209.0)   | 107.0 (77.0-156.0)                   | 81.5 (63.5-125.0)          | 102.5 (74.0-143.0)                | 82.0 (58.0-112.5)     | <0.001 |
| HDL-C, mean (SD), mg/dL           | 39.6 (9.7)            | 47.2 (10.9)                          | 71.7 (15.5)                | 54.6 (11.3)                       | 76.3 (16.6)           | <0.001 |
| Lipid-lowering medication, n (%)  | 36 (15.9)             | 73 (12.0)                            | 9 (6.6)                    | 26 (14.3)                         | 6 (12.0)              | 0.11   |
| Hypertension, n (%)               | 94 (41.6)             | 238 (39.3)                           | 51 (37.2)                  | 74 (40.7)                         | 17 (34.0)             | 0.83   |
| Diabetes, n (%)                   | 52 (23.0)             | 94 (15.5)                            | 8 (5.8)                    | 28 (15.4)                         | 4 (8.0)               | <0.001 |
| Smoking, n (%)                    | 71 (31.4)             | 186 (30.7)                           | 36 (26.3)                  | 49 (26.9)                         | 9 (18.0)              | 0.26   |
| Alcohol drinking, n (%)           | 63 (27.9)             | 209 (34.5)                           | 60 (43.8)                  | 50 (27.5)                         | 17 (34.0)             | 0.01   |
| Carotid IMT, mean (SD), mm        | 0.975 (0.366)         | 0.917 (0.296)                        | 0.879 (0.241)              | 0.892 (0.201)                     | 0.851 (0.166)         | 0.03   |

Abbreviations: BMI, body mass index; SBP, systolic blood pressure; DBP, diastolic blood pressure; TC, total cholesterol; non-HDL-C, Non-high-density lipoprotein-cholesterol; LDL-C, low-density lipoprotein cholesterol; HDL-C, high-density lipoprotein cholesterol; TG, triglycerides; IMT, intima-media thickness.

SI conversion factor: To convert glucose to mmol/L, multiply by 0.0555; to convert TC, non-HDL-C, LDL-C, and HDL-C to mmol/L, multiply by 0.0259; to convert TG to mmol/L, multiply by 0.0113.

One-way ANOVA and chi-square tests were performed for continuous variables and categorical variables, respectively.

**eTable 6. Covariate-Adjusted Carotid IMT and P Values for Comparisons Between Lipid Trajectory Groups**

| Trajectory group           | Mean IMT (SE) <sup>a</sup> | Trajectory groups |       |      |      |
|----------------------------|----------------------------|-------------------|-------|------|------|
|                            |                            | 1                 | 2     | 3    | 4    |
| TC                         |                            |                   |       |      |      |
| 1. Low-Stable              | 0.887 (0.017)              | Ref               |       |      |      |
| 2. Low-Slow Increase       | 0.932 (0.012)              | 0.02              | Ref   |      |      |
| 3. Low-Rapid Increase      | 0.952 (0.021)              | 0.01              | 0.38  | Ref  |      |
| 4. Moderate-Stable         | 0.926 (0.021)              | 0.13              | 0.81  | 0.37 | Ref  |
| 5. High-Stable             | 1.039 (0.045)              | 0.001             | 0.02  | 0.07 | 0.02 |
| non-HDL-C                  |                            |                   |       |      |      |
| 1. Low-Stable              | 0.876 (0.016)              | Ref               |       |      |      |
| 2. Low-Slow Increase       | 0.924 (0.012)              | 0.009             | Ref   |      |      |
| 3. Low-Rapid Increase      | 0.972 (0.023)              | <0.001            | 0.05  | Ref  |      |
| 4. Moderate-Stable         | 0.988 (0.021)              | <0.001            | 0.006 | 0.61 | Ref  |
| 5. High-Stable             | 1.107 (0.066)              | <0.001            | 0.006 | 0.05 | 0.08 |
| LDL-C                      |                            |                   |       |      |      |
| 1. Low-Stable              | 0.867 (0.016)              | Ref               |       |      |      |
| 2. Low-Slow Increase       | 0.935 (0.012)              | <0.001            | Ref   |      |      |
| 3. Low-Rapid Increase      | 0.970 (0.019)              | <0.001            | 0.10  | Ref  |      |
| 4. Moderate-Stable         | 0.959 (0.023)              | <0.001            | 0.34  | 0.69 | Ref  |
| 5. High-Stable             | 1.034 (0.060)              | 0.007             | 0.10  | 0.31 | 0.24 |
| TG                         |                            |                   |       |      |      |
| 1. Low-Stable              | 0.885 (0.018)              | Ref               |       |      |      |
| 2. Low-Slow Increase       | 0.927 (0.013)              | 0.05              | Ref   |      |      |
| 3. Low-Rapid Increase      | 0.946 (0.020)              | 0.03              | 0.40  | Ref  |      |
| 4. Moderate-Stable         | 0.956 (0.020)              | 0.007             | 0.18  | 0.71 | Ref  |
| 5. Moderate-Rapid increase | 0.942 (0.034)              | 0.15              | 0.67  | 0.91 | 0.70 |
| HDL-C                      |                            |                   |       |      |      |
| 1. High-Stable             | 0.886 (0.038)              | Ref               |       |      |      |
| 2. High-Rapid Decrease     | 0.889 (0.020)              | 0.17              | Ref   |      |      |
| 3. Moderate-Stable         | 0.918 (0.023)              | 0.46              | 0.55  | Ref  |      |
| 4. Moderate-Slow Decrease  | 0.933 (0.012)              | 0.07              | 0.05  | 0.35 | Ref  |
| 5. Low-Stable              | 0.962 (0.019)              | 0.08              | 0.93  | 0.14 | 0.23 |

SE, standard error; TC, total cholesterol; non-HDL-C, non-high-density lipoprotein-cholesterol; LDL-C, low-density lipoprotein cholesterol; HDL-C, high-density lipoprotein cholesterol; TG, triglycerides; IMT, intima-media thickness

a, adjusted for age, race, sex, and body mass index, lipid-lowering medication, hypertension, diabetes, smoking, alcohol drinking, and lipid levels in the last adult survey.

**eTable 7. Covariate-Adjusted Means of Adult Carotid IMT by Lipid Trajectory Group Adjusted for Clinical Risk Factors and Lipid Levels at Follow-up**

| Trajectory group        | Mean IMT (SE) <sup>a</sup> | P      |
|-------------------------|----------------------------|--------|
| TC                      |                            |        |
| Low-Stable              | 0.916 (0.025)              | Ref    |
| Low-Slow Increase       | 0.974 (0.016)              | 0.04   |
| Low-Rapid Increase      | 0.959 (0.030)              | 0.31   |
| Moderate-Stable         | 0.962 (0.027)              | 0.20   |
| High-Stable             | 1.086 (0.060)              | 0.01   |
| non-HDL-C               |                            |        |
| Low-Stable              | 0.901 (0.023)              | Ref    |
| Low-Slow Increase       | 0.964 (0.016)              | 0.02   |
| Low-Rapid Increase      | 0.988 (0.033)              | 0.04   |
| Moderate-Stable         | 1.042 (0.029)              | <0.001 |
| High-Stable             | 1.129 (0.089)              | 0.02   |
| LDL-C                   |                            |        |
| Low-Stable              | 0.872 (0.018)              | Ref    |
| Low-Slow Increase       | 0.932 (0.012)              | 0.004  |
| Low-Rapid Increase      | 0.966 (0.022)              | 0.002  |
| Moderate-Stable         | 0.960 (0.024)              | 0.003  |
| High-Stable             | 1.017 (0.063)              | 0.03   |
| TG                      |                            |        |
| Low-Stable              | 0.882 (0.021)              | Ref    |
| Low-Slow Increase       | 0.926 (0.013)              | 0.05   |
| Low-Rapid Increase      | 0.949 (0.022)              | 0.04   |
| Moderate-Stable         | 0.957 (0.020)              | 0.01   |
| Moderate-Rapid Increase | 0.947 (0.037)              | 0.16   |
| HDL-C                   |                            |        |
| Low-Stable              | 0.955 (0.020)              | 0.26   |
| Moderate-Slow Decrease  | 0.930 (0.012)              | 0.49   |
| Moderate-Stable         | 0.930 (0.026)              | 0.50   |
| High-Rapid Decrease     | 0.892 (0.020)              | 0.86   |
| High-Stable             | 0.900 (0.042)              | Ref    |

SE, standard error; TC, total cholesterol; non-HDL-C, non-high-density lipoprotein-cholesterol; LDL-C, low-density lipoprotein cholesterol; HDL-C, high-density lipoprotein cholesterol; TG, triglycerides; IMT, intima-media thickness  
a, adjusted for age, race, sex, and body mass index, lipid-lowering medication, hypertension, diabetes, smoking, alcohol drinking, and lipid levels in the last adult survey.

**eTable 8. Covariate-Adjusted Means of Adult Carotid IMT by Lipid Trajectory Group After Excluding Participants With Lipid-Lowering Medications**

| Trajectory group        | Model 1       |        | Model 2       |        |
|-------------------------|---------------|--------|---------------|--------|
|                         | Mean (SE)     | P      | Mean (SE)     | P      |
| TC                      |               |        |               |        |
| Low-Stable              | 0.873 (0.016) | Ref    | 0.871 (0.019) | Ref    |
| Low-Slow Increase       | 0.913 (0.012) | 0.03   | 0.913 (0.012) | 0.04   |
| Low-Rapid Increase      | 0.943 (0.021) | 0.007  | 0.944 (0.022) | 0.02   |
| Moderate-Stable         | 0.912 (0.022) | 0.14   | 0.914 (0.025) | 0.19   |
| High-Stable             | 1.030 (0.050) | 0.002  | 1.035 (0.055) | 0.007  |
| non-HDL-C               |               |        |               |        |
| Low-Stable              | 0.865 (0.015) | Ref    | 0.860 (0.017) | Ref    |
| Low-Slow Increase       | 0.910 (0.012) | 0.01   | 0.910 (0.012) | 0.01   |
| Low-Rapid Increase      | 0.957 (0.024) | 0.001  | 0.960 (0.025) | 0.001  |
| Moderate-Stable         | 0.968 (0.022) | <0.001 | 0.977 (0.026) | <0.001 |
| High-Stable             | 1.083 (0.077) | 0.005  | 1.101 (0.082) | 0.005  |
| LDL-C                   |               |        |               |        |
| Low-Stable              | 0.860 (0.015) | Ref    | 0.863 (0.017) | Ref    |
| Low-Slow Increase       | 0.921 (0.012) | <0.001 | 0.921 (0.012) | 0.004  |
| Low-Rapid Increase      | 0.945 (0.020) | <0.001 | 0.943 (0.020) | 0.004  |
| Moderate-Stable         | 0.937 (0.025) | 0.006  | 0.932 (0.029) | 0.06   |
| High-Stable             | 0.981 (0.070) | 0.09   | 0.971 (0.074) | 0.17   |
| TG                      |               |        |               |        |
| Low-Stable              | 0.872 (0.018) | Ref    | 0.876 (0.019) | Ref    |
| Low-Slow Increase       | 0.915 (0.013) | 0.04   | 0.916 (0.013) | 0.06   |
| Low-Rapid Increase      | 0.913 (0.020) | 0.13   | 0.913 (0.020) | 0.18   |
| Moderate-Stable         | 0.933 (0.020) | 0.02   | 0.928 (0.022) | 0.08   |
| Moderate-Rapid Increase | 0.942 (0.037) | 0.09   | 0.936 (0.038) | 0.18   |
| HDL-C                   |               |        |               |        |
| Low-Stable              | 0.927 (0.019) | 0.22   | 0.927 (0.022) | 0.28   |
| Moderate-Slow Decrease  | 0.920 (0.012) | 0.26   | 0.920 (0.012) | 0.28   |
| Moderate-Stable         | 0.899 (0.023) | 0.58   | 0.899 (0.023) | 0.59   |
| High-Rapid Decrease     | 0.875 (0.020) | 0.98   | 0.874 (0.022) | 0.98   |
| High-Stable             | 0.876 (0.037) | Ref    | 0.875 (0.040) | Ref    |

SE, standard error; TC, total cholesterol; non-HDL-C, non-high-density lipoprotein-cholesterol; LDL-C, low-density lipoprotein cholesterol; HDL-C, high-density lipoprotein cholesterol; TG, triglycerides; IMT, intima-media thickness

Model 1, adjusted for age, race, sex, and body mass index, lipid-lowering medication, hypertension, diabetes, smoking, alcohol drinking, and lipid levels in the last adult survey.

Model 2, Model 1 plus adjusted for lipid levels at baseline

**eFigure 1.** Flow Chart of the Study Cohort Selection

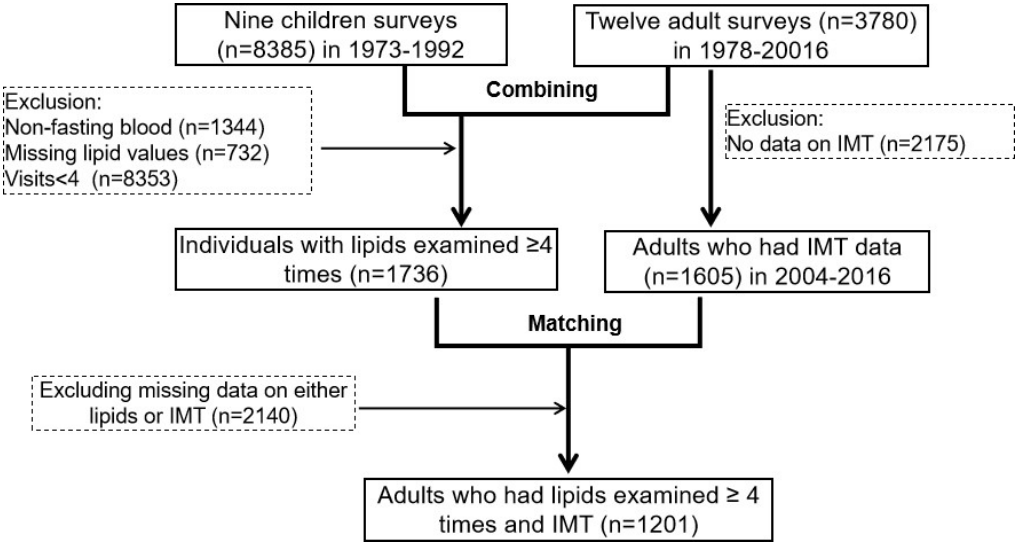

**eFigure 2.** Growth Curves of Lipids by Race and Sex

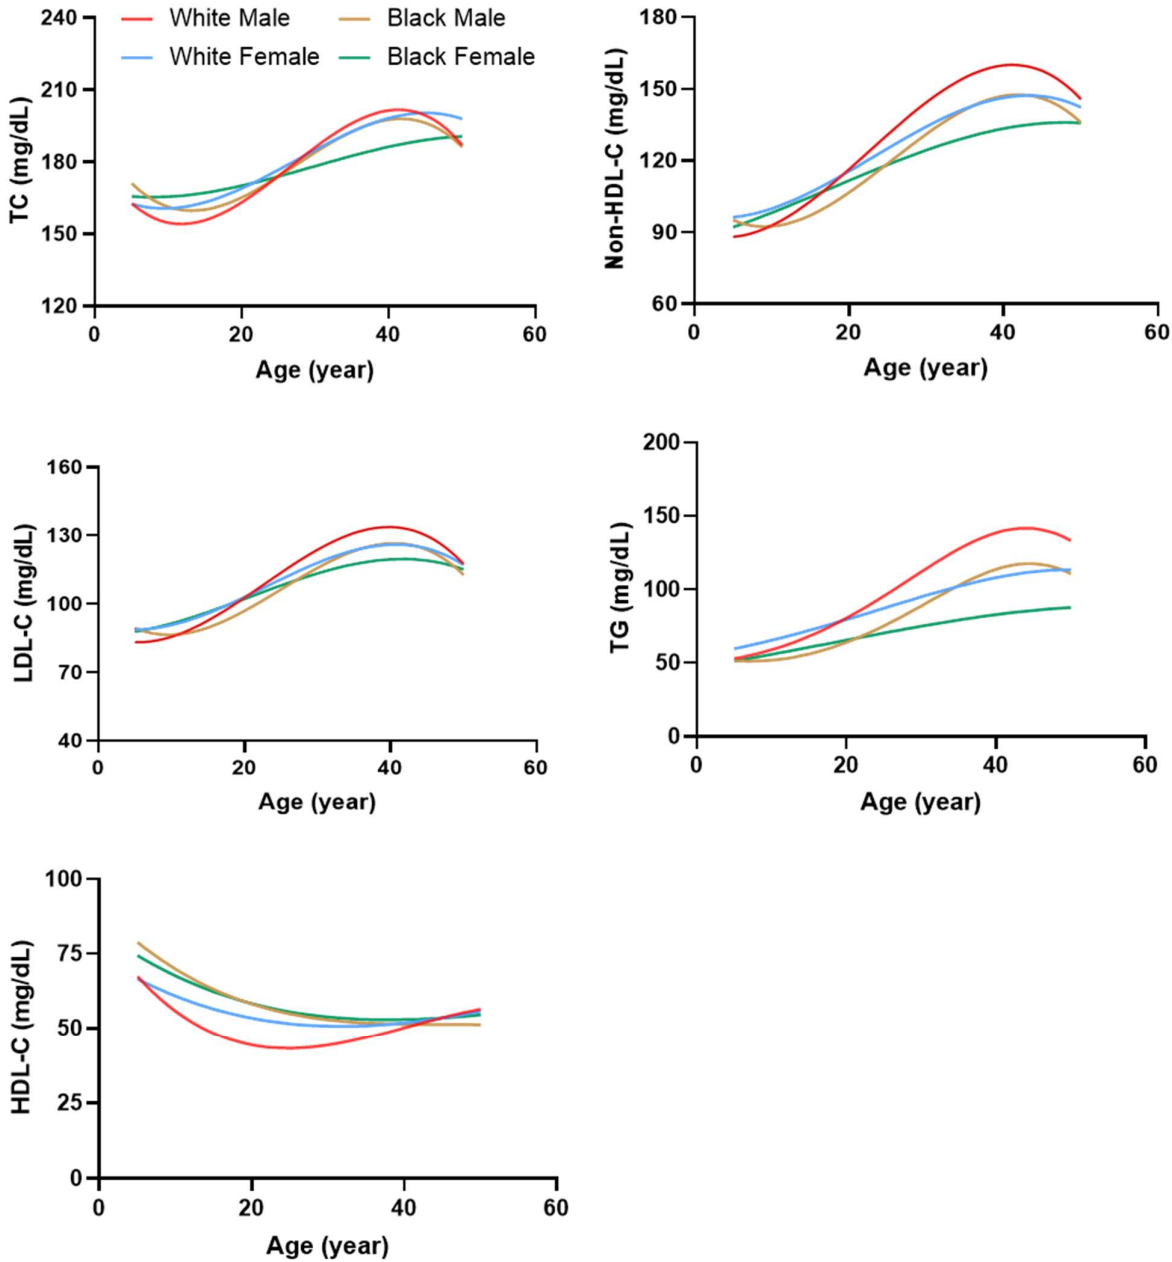

TC, total cholesterol; non-HDL-C, non-high-density lipoprotein-cholesterol; LDL-C, low-density lipoprotein cholesterol; TG, triglycerides; HDL-C, high-density lipoprotein cholesterol
